# Supplementary material for: The causal effect of gut microbiota on hepatic encephalopathy: a mendelian randomization analysis
Source: PubMed Central journal article supplement — BMC Med Genomics. 2024 Aug 19;17:216. doi: 10.1186/s12920-024-01939-y (PMC11334368; doi:10.1186/s12920-024-01939-y), 2024-08-19
Supplement: 12920_2024_1939_MOESM2_ESM.pdf [file 12920_2024_1939_MOESM2_ESM.pdf]

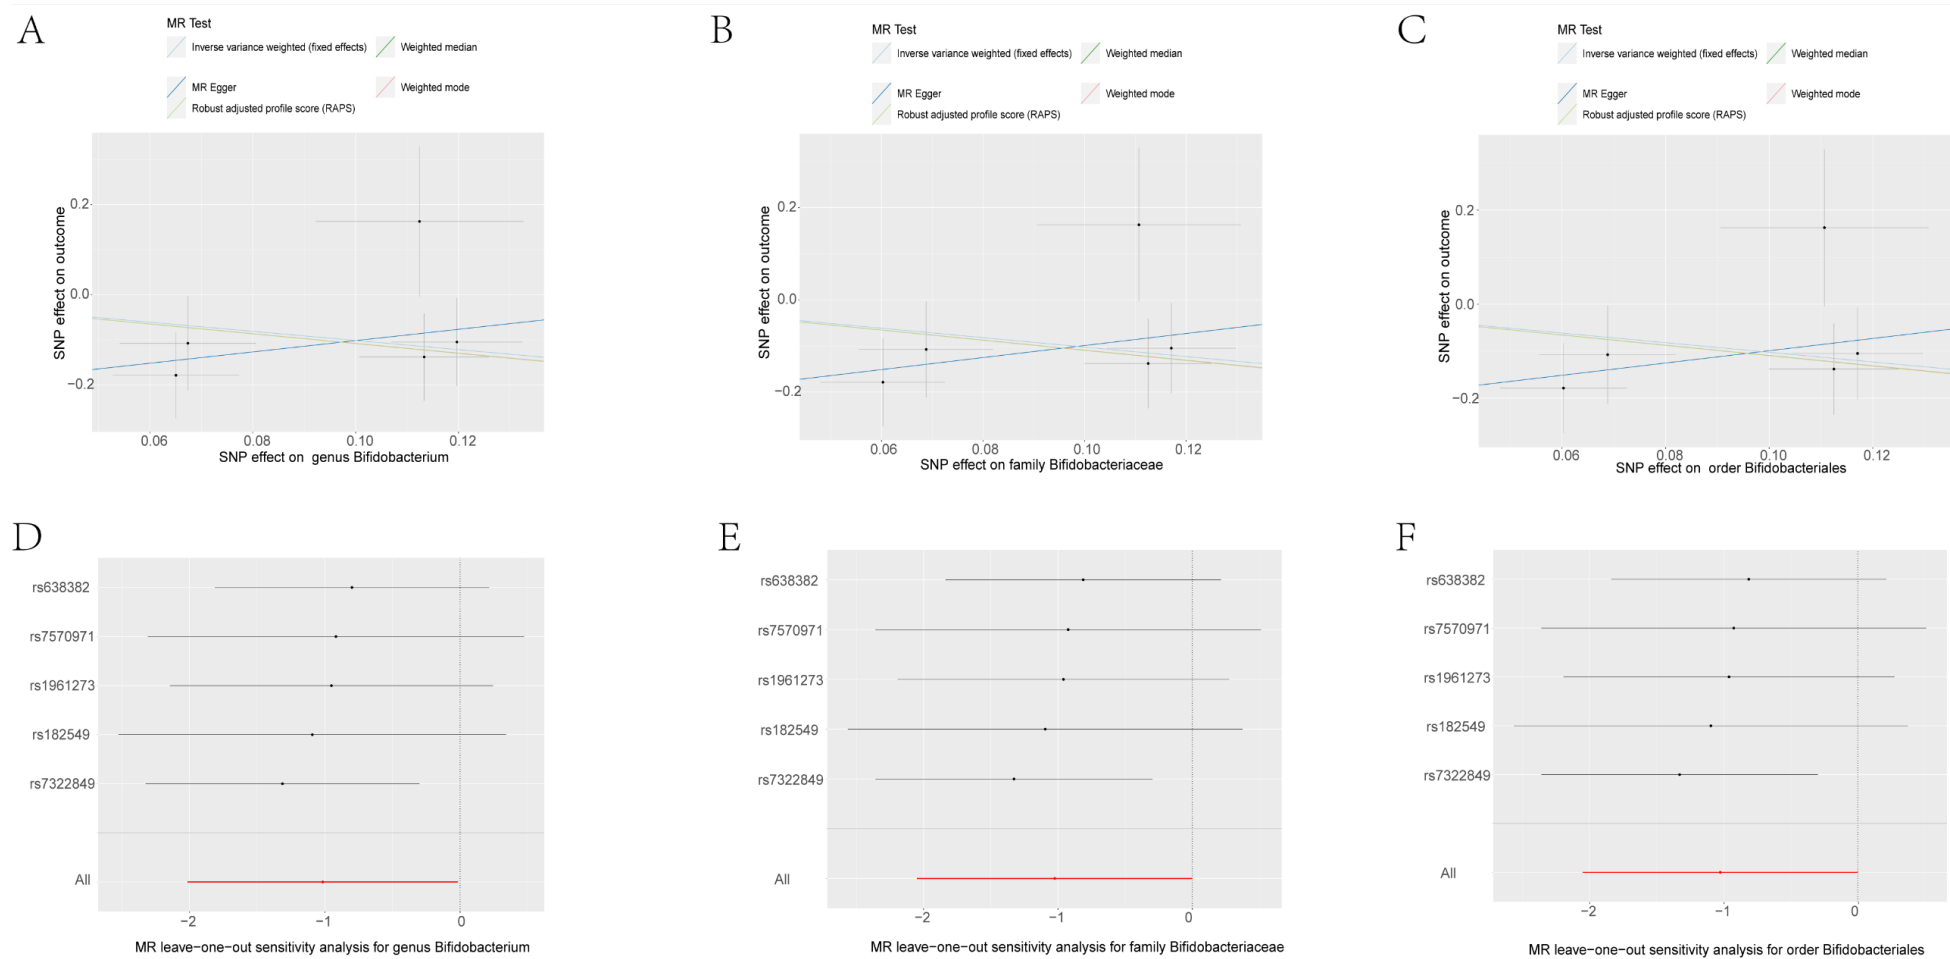

**Figure S1:** Scatter plots for the causal association between gut microbiota and HE. (A) genus Bifidobacterium (B) family Bifidobacteriaceae (C) order Bifidobacteriales. Leave-one-out plots for the causal association between gut microbiota and HE. (D) family Bifidobacteriaceae (E) family Bifidobacteriaceae (F) order Bifidobacteriales. MR, Mendelian Randomization; HE, hepatic encephalopathy.
